# Supplementary material
Source: Springer Nature journal article supplement (https://www.springermedizin.de/resource/supplementary/12902_2008_80_MOESM4_ESM.pdf/9516196)

**F  
r  
e  
q  
u  
e  
n  
c  
y**

Std. Deviation = 15.47  
Mean = 58.9  
N = 95.00

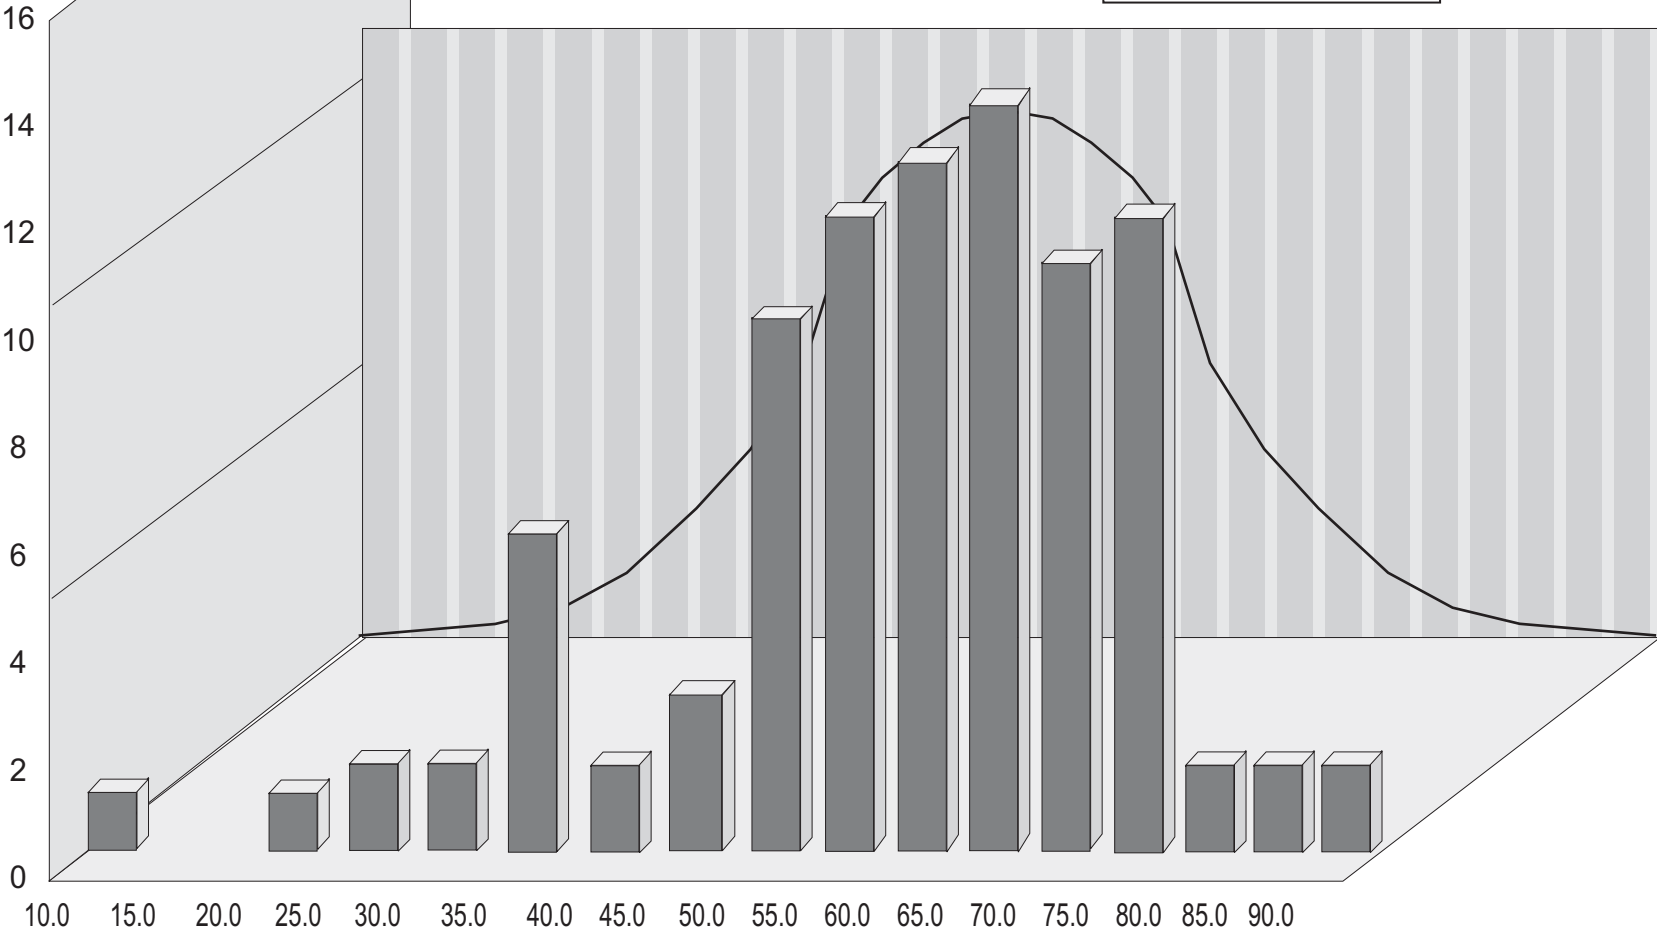

Supplement: MOESM4 [file 9516196]
